# Supplementary material for: Global Gene Expression Profiling in Three Tumor Cell Lines Subjected to Experimental Cycling and Chronic Hypoxia
Source: PLoS One. 2014 Aug 14;9(8):e105104. doi: 10.1371/journal.pone.0105104 (PMC4133353; doi:10.1371/journal.pone.0105104)
Supplement: Table S3 — Cycling hypoxia-responsive genes common to all three cell lines. (XLS) [file pone.0105104.s004.xls]

## Sheet: Cycling genes
Table S3. Genes significantly (FDR adjusted p<0.05, random variance F-test) changed in all three cell lines cells subjected to cycling hypoxia vs controls (FC>=2).
					PC-3					SK-OV-3					WM793B
Gene Symbol	Gene Name	Affy.ID	p.value	FDR corrected p.value	Fold change, chronic vs control	Fold change, cyclic vs control	Fold change, chronic vs cyclic	p.value	FDR corrected p.value	Fold change, chronic vs control	Fold change, cyclic vs control	Fold change, chronic vs cyclic	p.value	FDR corrected p.value	Fold change, chronic vs control	Fold change, cyclic vs control	Fold change, chronic vs cyclic
ENO2	enolase 2 (gamma, neuronal)	201313_at	1.42097e-07	2.60389e-05	7.09475	4.73459	1.49849	3.6638e-06	0.000334584	21.8369	3.10626	7.02996	7.00339e-07	0.000749976	26.9129	15.8132	1.70192
TNFAIP3	tumor necrosis factor, alpha-induced protein 3	202644_s_at	7.5318e-07	5.8147e-05	6.11334	4.90303	1.24685	0.0022256	0.0161497	2.11123	2.40615	0.87743	0.0042631	0.0362537	1.02234	0.465048	2.19836
LOXL2	lysyl oxidase-like 2	202997_s_at	3.03223e-06	0.000115918	5.87127	4.17085	1.40769	1.05134e-06	0.000175838	14.4919	11.8167	1.22639	0.000216971	0.0069362	2.18856	2.06521	1.05973
ALDOC	aldolase C, fructose-bisphosphate	202022_at	1.24849e-06	7.31932e-05	5.3248	3.96256	1.34378	4.03956e-06	0.000348447	12.8016	10.0699	1.27127	1.45591e-06	0.000930802	21.8003	12.2338	1.78198
IL1RAP	interleukin 1 receptor accessory protein	210233_at	5.97072e-06	0.000169132	4.68485	4.65266	1.00692	0.00110642	0.00992938	3.21226	3.40298	0.943955	0.000117495	0.00521394	6.66447	4.05835	1.64216
BNIP3	BCL2/adenovirus E1B 19kDa interacting protein 3	201848_s_at	1.11362e-06	6.91017e-05	4.38521	2.80359	1.56414	3.52142e-08	5.74313e-05	6.73752	2.28595	2.94736	1.60668e-06	0.000946039	12.9217	6.34175	2.03757
SAT1	spermidine/spermine N1-acetyltransferase 1	213988_s_at	2.20984e-06	9.80655e-05	4.30142	2.8938	1.48643	4.00327e-06	0.000348447	3.75288	3.82151	0.982041	0.000463318	0.0101036	3.19834	2.49095	1.28398
SPAG4	sperm associated antigen 4	219888_at	9.91419e-07	6.61439e-05	4.21823	3.53514	1.19323	3.55848e-06	0.000327881	9.04379	4.4247	2.04394	4.21986e-08	0.000217205	4.94584	3.98363	1.24154
CRABP2	cellular retinoic acid binding protein 2	202575_at	9.91528e-10	4.92459e-06	4.21519	3.30614	1.27496	0.000780271	0.00789204	3.44483	2.03218	1.69514	0.000341819	0.00874268	2.96347	2.45233	1.20843
PDK1	pyruvate dehydrogenase kinase, isozyme 1	226452_at	4.31052e-06	0.000140643	4.16117	3.84709	1.08164	2.60386e-06	0.000281248	5.90925	3.07749	1.92015	1.84872e-05	0.00231549	8.59818	4.44118	1.93601
CXCL2	chemokine (C-X-C motif) ligand 2	209774_x_at	5.47286e-05	0.000674303	3.72785	3.87645	0.961666	6.75993e-05	0.00173609	0.252494	2.12102	0.119044	0.00455801	0.0377593	0.742711	0.220697	3.3653
PDK1	pyruvate dehydrogenase kinase, isozyme 1	206686_at	7.40656e-06	0.00019256	3.67993	3.48971	1.05451	0.00213305	0.0156823	3.58582	2.45466	1.46082	3.22202e-05	0.00288735	10.7802	5.13086	2.10104
SAT1	spermidine/spermine N1-acetyltransferase 1	210592_s_at	1.93133e-07	2.92124e-05	3.51873	2.51803	1.39742	7.98174e-07	0.000162328	3.61049	3.73703	0.966137	0.000977597	0.0151673	2.5452	2.06733	1.23115
IKIP	IKK interacting protein	227295_at	3.58569e-06	0.000126373	3.40367	2.89316	1.17646	6.64929e-07	0.000150859	4.42895	2.13906	2.07052	0.000529285	0.0108843	2.00488	2.05157	0.977242
PGK1	phosphoglycerate kinase 1	200737_at	7.09991e-06	0.000187902	3.36492	3.0899	1.08901	1.33475e-05	0.000662698	3.92931	2.66938	1.47199	1.10586e-07	0.000338353	4.6896	4.1862	1.12025
P4HA1	prolyl 4-hydroxylase, alpha polypeptide I	207543_s_at	7.79171e-07	5.89482e-05	3.16344	2.19825	1.43907	1.22391e-07	7.10059e-05	8.077	3.42403	2.35891	2.85089e-05	0.00267217	4.10674	2.79322	1.47025
RNASE4	ribonuclease, RNase A family, 4	205158_at	5.89982e-06	0.000167617	3.13835	2.36551	1.32671	1.75532e-07	8.37249e-05	28.7727	13.8452	2.07817	2.49351e-05	0.00251317	9.80168	5.83638	1.67941
TMEM45A	transmembrane protein 45A	219410_at	2.20783e-08	1.45133e-05	3.13468	2.73017	1.14816	8.66811e-06	0.000522506	11.3372	4.33824	2.61331	3.64181e-07	0.000508982	5.53011	4.44097	1.24525
CXCL1	chemokine (C-X-C motif) ligand 1 (melanoma growth stimulating activity, alpha)	204470_at	7.80664e-08	2.15523e-05	3.11403	3.43959	0.905347	0.000265742	0.00395581	0.771583	2.2316	0.345753	0.00340313	0.0315254	0.630104	0.485088	1.29895
BNIP3	BCL2/adenovirus E1B 19kDa interacting protein 3	201849_at	1.16146e-05	0.000252147	2.94792	2.16296	1.36291	1.47949e-06	0.000214158	6.41517	2.32104	2.76392	5.857e-07	0.000678067	7.54307	5.13674	1.46845
MYADM	myeloid-associated differentiation marker	224920_x_at	8.82937e-05	0.000941042	2.91863	2.12732	1.37197	0.000345607	0.00465741	7.21583	3.77921	1.90935	0.00399071	0.0347797	2.47473	2.38881	1.03597
ANG	angiogenin, ribonuclease, RNase A family, 5	213397_x_at	1.97347e-06	9.2662e-05	2.78595	2.34741	1.18682	2.99077e-07	0.000102611	27.9557	13.1277	2.12953	6.39287e-06	0.00156479	10.5667	6.85756	1.54088
PGK1	phosphoglycerate kinase 1	227068_at	4.10454e-06	0.000136968	2.70815	2.55995	1.05789	2.46024e-06	0.000274265	3.6267	2.60575	1.3918	9.77656e-05	0.00479324	3.14311	2.87931	1.09162
CYP1B1	cytochrome P450, family 1, subfamily B, polypeptide 1	202437_s_at	1.10877e-06	6.91017e-05	2.49416	3.38176	0.737532	0.000448319	0.00548314	0.754965	0.492335	1.53344	0.0019568	0.0226837	3.22787	3.81391	0.846341
CYR61	cysteine-rich, angiogenic inducer, 61	210764_s_at	1.94313e-06	9.24904e-05	2.40348	2.57036	0.935074	0.000564357	0.00638921	2.14392	3.50568	0.611555	6.02473e-05	0.0039703	3.4137	2.32349	1.46921
FAM162A	family with sequence similarity 162, member A	223193_x_at	6.26263e-07	5.24231e-05	2.34141	2.26199	1.03511	7.89217e-08	6.47861e-05	4.86145	3.36975	1.44267	9.23936e-08	0.000304437	4.71721	3.96159	1.19074
FAM162A	family with sequence similarity 162, member A	224345_x_at	2.54624e-07	3.32632e-05	2.27671	2.26821	1.00375	2.40135e-07	9.22651e-05	4.71787	3.35706	1.40536	3.68354e-07	0.000508982	4.73096	3.90749	1.21074
CYP1B1	cytochrome P450, family 1, subfamily B, polypeptide 1	202435_s_at	1.22493e-06	7.24267e-05	2.27646	2.76545	0.823179	0.00483337	0.0281329	0.762464	0.484915	1.57237	0.00163875	0.0204652	2.3377	2.23174	1.04748
FAM162A	family with sequence similarity 162, member A	220942_x_at	7.79383e-07	5.89482e-05	2.16849	2.23715	0.96931	4.88861e-09	2.31056e-05	4.79561	3.39188	1.41385	3.00713e-06	0.00115435	4.40983	3.61825	1.21877
GPI	glucose phosphate isomerase	208308_s_at	3.77713e-06	0.000130176	2.16503	2.17843	0.99385	1.68869e-05	0.000775073	2.70868	2.03136	1.33343	4.18716e-05	0.00326104	3.15223	2.60821	1.20858
PGK1	phosphoglycerate kinase 1	217356_s_at	1.52341e-05	0.000294153	2.09773	2.08075	1.00816	6.35762e-06	0.00044045	3.02588	2.45581	1.23213	3.52693e-06	0.00120861	3.0798	2.9759	1.03492
CYR61	cysteine-rich, angiogenic inducer, 61	201289_at	8.76444e-07	6.23838e-05	2.05966	2.22179	0.92703	0.000686152	0.00723979	2.04979	3.31626	0.618105	0.000115604	0.00518705	2.93714	2.1382	1.37365
DNAJB4	DnaJ (Hsp40) homolog, subfamily B, member 4	203810_at	0.000107376	0.00107602	1.97828	2.5731	0.76883	0.00972074	0.046859	0.791434	0.493653	1.60322	6.00108e-05	0.00396466	2.13585	2.30914	0.924954
POP5	processing of precursor 5, ribonuclease P/MRP subunit (S. cerevisiae)	204839_at	2.13645e-07	3.06087e-05	0.35311	0.467758	0.754898	6.29799e-05	0.00167264	0.285631	0.41682	0.685262	6.2588e-05	0.0040198	0.317664	0.487987	0.650967
SHMT1	serine hydroxymethyltransferase 1 (soluble)	209980_s_at	6.4271e-05	0.000753848	0.271551	0.48552	0.5593	0.0094825	0.0460152	0.399573	0.489974	0.815498	0.00270181	0.027558	0.290223	0.445736	0.651109
NA	NA	239252_at	0.00080065	0.00469501	0.257732	0.338775	0.760776	0.000293375	0.00421029	0.294701	0.334342	0.881434	0.0063627	0.046773	0.408188	0.356074	1.14636
