# Supplementary material for: Global Gene Expression Profiling in Three Tumor Cell Lines Subjected to Experimental Cycling and Chronic Hypoxia
Source: PLoS One. 2014 Aug 14;9(8):e105104. doi: 10.1371/journal.pone.0105104 (PMC4133353; doi:10.1371/journal.pone.0105104)
Supplement: Table S8 — The results of GSEA with gene sets for selected processes and signaling pathways (289 Gene Sets). (XLSX) [file pone.0105104.s009.xlsx]

## Sheet: GSEA
Table S8 GSEA analysis with selected gene set collections MSigDB (289 Gene Sets). We applied two independent tests: the KS permutation test and Efron-Tibshirani GSA test to identify gene sets differentiating experimental samples and control ones in three cell lines. Categories with a FDR corrected p-value of less than 0.05 in at least one statistical tests used, have significant overrepresentatio…
Legend: Cy - cycling hypoxia; Co - controls; Ch - chronic hypoxia
PC-3 - p<0.05 in cycling vs. control comparison in either KS or GSA test			PC-3 - PROSTATE CANCER CELLS						SK-OV-3 - OVARIAN CANCER CELLS						WM793B - MELANOMA CELLS
SK-OV-3 - p<0.05 in cycling vs. control comparison in either KS or GSA test
WM793B - p<0.05 in cycling vs. control comparison in either KS or GSA test
* p<0.05 in cycling vs. control comparison in both KS and GSA test
Broad GeneSets	Number of genes	PC3_Cy_Co		PC3_Cy_Ch		PC3_Ch_Co		SKOV3_Cy_Co		SKOV3_Cy_Ch		SKOV3_Ch_Co		WM793B_Cy_Co		WM793B_Cy_Ch		WM793B_Ch_Co
		KS.permutation.p.value	Efron.Tibshirani.s.GSA.test.p.value	KS.permutation.p.value	Efron.Tibshirani.s.GSA.test.p.value	KS.permutation.p.value	Efron.Tibshirani.s.GSA.test.p.value	KS.permutation.p.value	Efron.Tibshirani.s.GSA.test.p.value	KS.permutation.p.value	Efron.Tibshirani.s.GSA.test.p.value	KS.permutation.p.value	Efron.Tibshirani.s.GSA.test.p.value	KS.permutation.p.value	Efron.Tibshirani.s.GSA.test.p.value	KS.permutation.p.value	Efron.Tibshirani.s.GSA.test.p.value	KS.permutation.p.value	Efron.Tibshirani.s.GSA.test.p.value
HYPOXIA
GROSS_HYPOXIA_VIA_ELK3_AND_HIF1A_DN	171	0.05432	0.29195	0.08228	0.23993	0.11208	0.29572	0.035	0.25588	0.1319	0.35	0.06117	0.005	0.33928	0.1838	0.17058	0.005	0.03901	0.005
GROSS_HYPOXIA_VIA_ELK3_AND_HIF1A_UP	248	1e-05	0.005	0.00031	0.005	0.00031	0.005	1e-05	0.005	1e-05	0.06692	1e-05	0.005	0.01134	0.005	0.00041	0.005	1e-05	0.005
GROSS_HYPOXIA_VIA_HIF1A_DN	140	0.03033	0.17938	0.0004	0.005	0.19363	0.005	0.00075	0.29624	1e-05	0.06692	1e-05	0.005	0.18709	0.25	0.31233	0.28402	0.05229	0.34845
GROSS_HYPOXIA_VIA_HIF1A_ONLY	14	0.0041	0.29195	0.00233	0.005	1e-05	0.005	0.0575	0.15379	1e-05	0.005	0.00164	0.3527	0.89466	0.40628	0.00012	0.005	0.03642	0.3335
GROSS_HYPOXIA_VIA_HIF1A_UP	121	0.00559	0.23957	0.00514	0.12609	0.00131	0.29572	0.1759	0.35868	0.00079	0.14926	0.30767	0.30168	0.0029	0.3625	0.01098	0.005	0.00489	0.005
QI_HYPOXIA_TARGETS_OF_HIF1A_AND_FOXA2	55	1e-05	0.20519	0.00925	0.005	0.01073	0.29572	0.0575	0.29624	0.00072	0.06692	0.07157	0.23918	0.10608	0.39726	0.04091	0.42647	0.00119	0.37068
REACTOME_REGULATION_OF_HYPOXIA_INDUCIBLE_FACTOR_HIF_BY_OXYGEN	29	0.11111	0.29	0.00121	0.005	0.00156	0.005	0.12109	0.33296	0.01837	0.33296	0.00353	0.30168	0.22464	0.005	0.1307	0.005	0.00072	0.16812
GROSS_HYPOXIA_VIA_ELK3_DN	262	8e-05	0.005	0.00153	0.005	0.00369	0.005	1e-05	0.005	1e-05	0.005	1e-05	0.005	0.56695	0.35636	0.09269	0.16111	0.24761	0.41429
GROSS_HYPOXIA_VIA_ELK3_ONLY_DN	59	0.38211	0.44321	0.61087	0.46113	0.50686	0.39956	0.07905	0.33296	0.22138	0.0537	0.27795	0.28543	0.69677	0.44523	1	0.3649	0.89441	0.40781
GROSS_HYPOXIA_VIA_ELK3_ONLY_UP	46	0.26047	0.005	0.44666	0.005	0.02844	0.17527	0.91665	0.50347	0.01088	0.005	0.06805	0.26895	0.29252	0.25	0.60292	0.005	0.94432	0.41526
GROSS_HYPOXIA_VIA_ELK3_UP	321	0.15609	0.41942	0.01126	0.26453	0.00114	0.4	1e-05	0.32067	0.18935	0.005	0.03566	0.38234	0.13461	0.40628	0.77044	0.16111	0.21209	0.34845
BIOCARTA_P53HYPOXIA_PATHWAY	47	0.01922	0.29	0.51379	0.41429	0.65056	0.41102	0.31388	0.005	0.23498	0.33296	0.66915	0.14684	0.60124	0.3625	0.41354	0.33296	0.32786	0.37593
ELVIDGE_HYPOXIA_BY_DMOG_DN	91	0.1044	0.005	0.02614	0.005	0.02112	0.005	0.09276	0.34693	0.0004	0.005	0.00257	0.005	0.00196	0.16812	0.00012	0.005	0.00045	0.005
ELVIDGE_HYPOXIA_BY_DMOG_UP	261	1e-05	0.005	1e-05	0.005	1e-05	0.005	1e-05	0.005	1e-05	0.005	1e-05	0.005	0.00456	0.005	1e-05	0.005	9e-05	0.005
ELVIDGE_HYPOXIA_DN	260	0.00497	0.005	0.00141	0.005	0.00052	0.29572	0.00416	0.32067	1e-05	0.005	1e-05	0.005	0.01271	0.40628	1e-05	0.005	0.00017	0.32551
ELVIDGE_HYPOXIA_UP	329	1e-05	0.005	1e-05	0.005	1e-05	0.005	1e-05	0.005	1e-05	0.005	1e-05	0.005	0.00196	0.005	1e-05	0.005	1e-05	0.005
FARDIN_HYPOXIA_11	62	0.00035	0.005	0.00944	0.005	1e-05	0.005	1e-05	0.16571	1e-05	0.005	1e-05	0.005	0.00633	0.005	1e-05	0.005	1e-05	0.005
FARDIN_HYPOXIA_9	14	0.00066	0.005	0.3261	0.005	1e-05	0.005	1e-05	0.005	1e-05	0.005	1e-05	0.005	1e-05	0.005	1e-05	0.005	0.00024	0.005
HARRIS_HYPOXIA	132	1e-05	0.005	0.00331	0.005	1e-05	0.005	1e-05	0.005	1e-05	0.06692	1e-05	0.005	0.00038	0.005	1e-05	0.005	1e-05	0.005
JIANG_HYPOXIA_CANCER	114	1e-05	0.005	0.00114	0.22835	1e-05	0.005	0.06822	0.33296	0.05203	0.46807	0.00181	0.38839	1e-05	0.005	0.10348	0.44746	1e-05	0.43668
JIANG_HYPOXIA_NORMAL	514	1e-05	0.17151	0.01125	0.19595	1e-05	0.005	1e-05	0.34424	0.00031	0.06692	1e-05	0.14684	0.01314	0.30526	0.52387	0.33296	0.0184	0.26364
JIANG_HYPOXIA_VIA_VHL	52	0.26469	0.29	0.17254	0.47326	0.03392	0.4441	0.47475	0.35407	0.54028	0.005	0.99993	0.33833	0.68153	0.42756	0.74391	0.33296	0.12984	0.41526
KIM_HYPOXIA	46	1e-05	0.12083	1e-05	0.005	1e-05	0.005	0.0004	0.005	0.00121	0.005	1e-05	0.005	0.05912	0.005	1e-05	0.005	1e-05	0.005
KONDO_HYPOXIA	8	0.14702	0.30728	0.14828	0.005	0.1059	0.005	0.02396	0.33296	0.13865	0.06692	0.11528	0.30168	0.0019	0.3625	0.27159	0.005	0.09089	0.005
KRIEG_HYPOXIA_NOT_VIA_KDM3A	1133	1e-05	0.24167	1e-05	0.38045	1e-05	0.41102	1e-05	0.37545	1e-05	0.32658	1e-05	0.33833	1e-05	0.16812	1e-05	0.005	1e-05	0.16812
KRIEG_HYPOXIA_VIA_KDM3A	96	0.00131	0.2626	0.28782	0.23993	0.01303	0.37826	1e-05	0.005	0.03157	0.22025	0.00425	0.005	0.71656	0.40628	1	0.4655	0.98438	0.41526
KRIEG_KDM3A_TARGETS_NOT_HYPOXIA	250	0.00035	0.22009	1e-05	0.005	0.00057	0.005	0.00034	0.21267	0.04121	0.38341	0.00799	0.22065	0.02455	0.40628	0.2982	0.24681	0.0408	0.38667
LEONARD_HYPOXIA	89	1e-05	0.005	1e-05	0.005	1e-05	0.005	0.00022	0.26067	1e-05	0.005	1e-05	0.005	0.00884	0.005	1e-05	0.005	1e-05	0.005
MAINA_HYPOXIA_VHL_TARGETS_UP	12	0.06214	0.31401	0.02584	0.23993	0.01376	0.3605	0.47122	0.32067	0.18609	0.33178	0.13608	0.24167	0.9154	0.44704	0.28484	0.42987	0.40175	0.34845
MANALO_HYPOXIA_DN	412	1e-05	0.005	1e-05	0.005	1e-05	0.005	0.42822	0.37545	0.0276	0.22809	0.0472	0.18547	1e-05	0.005	1e-05	0.005	1e-05	0.005
MANALO_HYPOXIA_UP	350	0.02696	0.005	0.09903	0.005	0.34352	0.005	1e-05	0.005	1e-05	0.005	1e-05	0.005	0.00467	0.005	0.02383	0.005	0.00017	0.005
MENSE_HYPOXIA_UP	200	1e-05	0.005	1e-05	0.005	1e-05	0.005	1e-05	0.33296	1e-05	0.06692	1e-05	0.005	1e-05	0.005	1e-05	0.005	1e-05	0.005
MIZUKAMI_HYPOXIA_DN	10	0.38211	0.005	0.35716	0.005	0.5243	0.005	0.25651	0.005	0.20643	0.005	0.4647	0.4234	0.11506	0.3625	0.98898	0.43057	0.05568	0.4287
MIZUKAMI_HYPOXIA_UP	16	0.4507	0.29	0.35716	0.005	0.677	0.005	0.04518	0.26067	0.15612	0.005	0.12278	0.005	0.25705	0.3874	0.00504	0.005	0.06304	0.005
QI_HYPOXIA	200	0.00123	0.005	1e-05	0.005	1e-05	0.005	0.00022	0.16571	1e-05	0.005	1e-05	0.005	1e-05	0.005	1e-05	0.005	1e-05	0.005
REACTOME_OXYGEN_DEPENDENT_PROLINE_HYDROXYLATION_OF_HYPOXIA_INDUCIBLE_FACTOR_ALPHA	17	0.29697	0.35898	0.00425	0.23605	0.00163	0.005	0.13155	0.33296	0.23498	0.34907	0.06805	0.23138	0.53429	0.43682	0.42079	0.29813	0.00811	0.29624
RESPONSE_TO_HYPOXIA	55	0.27003	0.35905	0.00743	0.005	0.01861	0.005	0.01267	0.38552	0.00593	0.005	0.00799	0.005	0.19588	0.005	0.38254	0.005	0.12614	0.005
WACKER_HYPOXIA_TARGETS_OF_VHL	26	0.26047	0.005	0.34433	0.005	0.63551	0.005	1e-05	0.005	0.00357	0.005	1e-05	0.005	0.00633	0.005	1e-05	0.005	9e-05	0.005
WEINMANN_ADAPTATION_TO_HYPOXIA_DN	76	0.11341	0.13647	0.6268	0.14032	0.22338	0.005	1e-05	0.005	0.01837	0.36045	8e-05	0.005	0.89466	0.45173	0.79589	0.4655	0.60127	0.41904
WEINMANN_ADAPTATION_TO_HYPOXIA_UP	53	0.63489	0.38054	0.65061	0.31949	0.72103	0.12083	0.02862	0.005	0.06155	0.33697	0.01955	0.005	0.99109	0.40628	0.95001	0.47802	0.39442	0.41429
WINTER_HYPOXIA_DN	39	0.99579	0.39545	0.99999	0.12609	1	0.32914	0.99987	0.4	0.57041	0.25947	0.98787	0.38839	0.36045	0.45873	0.95001	0.48161	0.9518	0.43668
WINTER_HYPOXIA_METAGENE	389	1e-05	0.005	0.00022	0.005	1e-05	0.005	1e-05	0.005	1e-05	0.005	1e-05	0.005	1e-05	0.005	0.00068	0.005	1e-05	0.005
WINTER_HYPOXIA_UP	116	1e-05	0.005	0.00048	0.005	1e-05	0.005	1e-05	0.21267	1e-05	0.005	8e-05	0.005	0.01134	0.005	0.01235	0.005	0.00349	0.005
HIF
GROSS_HIF1A_TARGETS_DN	39	0.01263	0.005	0.69273	0.005	0.00031	0.005	0.00057	0.005	0.00133	0.20714	0.00088	0.005	1e-05	0.005	0.01477	0.33296	1e-05	0.005
GROSS_HIF1A_TARGETS_UP	10	0.97804	0.43047	0.99999	0.31446	1	0.44893	0.09885	0.005	0.95566	0.42647	0.05723	0.38234	0.6309	0.25	1	0.24681	0.80144	0.34845
BIOCARTA_HIF_PATHWAY	32	1e-05	0.13647	0.00022	0.005	0.00095	0.32532	0.00329	0.005	0.87591	0.38483	0.07967	0.005	0.68153	0.40628	0.47446	0.005	0.69219	0.15859
ELVIDGE_HIF1A_AND_HIF2A_TARGETS_DN	202	1e-05	0.005	1e-05	0.005	1e-05	0.005	1e-05	0.005	1e-05	0.005	1e-05	0.005	1e-05	0.005	1e-05	0.005	1e-05	0.005
ELVIDGE_HIF1A_AND_HIF2A_TARGETS_UP	65	0.00261	0.005	0.00013	0.005	1e-05	0.005	0.11805	0.18125	1e-05	0.005	1e-05	0.005	0.03363	0.16812	1e-05	0.005	0.01197	0.32551
ELVIDGE_HIF1A_TARGETS_DN	163	1e-05	0.005	1e-05	0.005	1e-05	0.03816	1e-05	0.005	1e-05	0.005	1e-05	0.005	1e-05	0.005	1e-05	0.005	1e-05	0.005
ELVIDGE_HIF1A_TARGETS_UP	119	0.00917	0.005	1e-05	0.005	1e-05	0.005	0.14015	0.24756	1e-05	0.005	1e-05	0.005	0.01854	0.40628	1e-05	0.005	1e-05	0.005
ELVIDGE_HIF2A_TARGETS_UP	13	0.15249	0.19902	0.79296	0.43721	0.02844	0.38264	0.11354	0.005	0.60978	0.38496	0.22574	0.16111	0.76647	0.005	0.70657	0.43851	0.94432	0.005
PID_HIF1_TFPATHWAY	125	0.26283	0.31401	0.00934	0.005	0.0046	0.13034	1e-05	0.005	0.00031	0.005	1e-05	0.005	0.3825	0.005	0.0005	0.05088	0.05044	0.005
PID_HIF1APATHWAY	21	0.37881	0.5218	0.00963	0.23993	0.0112	0.3605	0.25285	0.33296	0.46918	0.39658	0.3562	0.30168	0.59136	0.005	0.00679	0.24681	9e-05	0.29624
PID_HIF2PATHWAY	58	0.00175	0.005	0.01402	0.005	0.00057	0.005	0.0658	0.34613	0.03259	0.06692	0.0418	0.22065	0.85153	0.16812	0.03186	0.005	0.01651	0.005
SEMENZA_HIF1_TARGETS	63	0.0039	0.005	0.27554	0.005	0.06664	0.005	1e-05	0.005	1e-05	0.005	1e-05	0.005	1e-05	0.005	1e-05	0.005	1e-05	0.005
NFkB
BIOCARTA_EPONFKB_PATHWAY	17	0.01736	0.33212	0.14708	0.4176	0.02057	0.38264	0.87187	0.35868	0.35498	0.33296	0.9681	0.4125	0.0406	0.40628	0.09563	0.24681	0.00083	0.38667
BIOCARTA_NFKB_PATHWAY	31	0.6786	0.43444	0.61614	0.4715	0.89878	0.35843	0.9002	0.24756	0.22556	0.37143	0.87904	0.4168	0.93693	0.45873	0.19444	0.3649	0.86775	0.4261
BREDEMEYER_RAG_SIGNALING_VIA_ATM_NOT_VIA_NFKB_DN	57	0.37947	0.31522	0.35263	0.45111	0.58612	0.29572	0.79767	0.37545	0.70968	0.38496	0.68539	0.42841	0.85153	0.40628	0.48912	0.40048	0.211	0.45378
BREDEMEYER_RAG_SIGNALING_VIA_ATM_NOT_VIA_NFKB_UP	69	0.23218	0.44321	0.1113	0.39243	0.2345	0.40837	0.47639	0.24167	0.69484	0.28431	0.14246	0.3307	0.92763	0.38955	1	0.43851	0.83922	0.45378
DEBOSSCHER_NFKB_TARGETS_REPRESSED_BY_GLUCOCORTICOIDS	19	0.19785	0.005	0.54635	0.43444	0.34687	0.005	0.00618	0.15379	0.57748	0.32658	0.47915	0.005	0.68153	0.44704	0.03787	0.16111	0.38185	0.34845
DUTTA_APOPTOSIS_VIA_NFKB	55	0.0205	0.13182	0.61614	0.20714	0.3886	0.3605	0.0413	0.34654	0.17474	0.36453	0.05008	0.3773	0.28746	0.38955	0.70657	0.43851	0.9057	0.41526
GILMORE_CORE_NFKB_PATHWAY	17	0.12398	0.47464	0.34666	0.40314	0.03391	0.43446	0.34816	0.40247	0.02929	0.34907	0.99993	0.13716	0.49517	0.35636	0.01467	0.35468	0.06901	0.42076
HANSON_HRAS_SIGNALING_VIA_NFKB	31	0.58663	0.40278	0.48228	0.435	1	0.44893	0.28156	0.34613	0.20758	0.16338	0.99993	0.30168	0.82742	0.42756	1	0.43851	0.9057	0.29624
HINATA_NFKB_IMMU_INF	23	0.00171	0.15174	0.6233	0.46113	0.00826	0.29244	0.1759	0.33296	0.35498	0.005	0.55902	0.32422	0.06042	0.40331	0.01503	0.42987	0.06943	0.3879
HINATA_NFKB_MATRIX	28	0.02924	0.23957	0.6852	0.4176	0.0044	0.41102	0.14085	0.3625	0.75094	0.38341	0.87904	0.26895	0.89466	0.40628	0.95001	0.39736	0.70403	0.36527
HINATA_NFKB_TARGETS_FIBROBLAST_UP	142	1e-05	0.13647	0.34666	0.39243	9e-05	0.27982	0.2196	0.34731	0.93996	0.005	0.79622	0.3307	0.86785	0.40628	0.51287	0.17877	0.70352	0.45571
HINATA_NFKB_TARGETS_KERATINOCYTE_DN	31	0.48562	0.005	0.44666	0.2535	1	0.29572	0.04633	0.075	0.34229	0.34971	0.10715	0.005	0.97844	0.40628	0.70657	0.42182	0.83382	0.43668
HINATA_NFKB_TARGETS_KERATINOCYTE_UP	139	0.00089	0.13647	0.1639	0.39243	0.00088	0.27982	0.09944	0.34613	0.45675	0.42267	0.78183	0.50851	0.62108	0.44704	0.23091	0.29813	0.56081	0.005
JAIN_NFKB_SIGNALING	101	0.11432	0.005	0.02892	0.12609	0.19363	0.31806	0.43518	0.34654	0.309	0.34907	0.2585	0.23918	0.00962	0.40628	0.00226	0.28402	0.10796	0.41429
MANTOVANI_NFKB_TARGETS_DN	8	0.10465	0.38054	0.77922	0.4176	0.79956	0.39842	0.52939	0.40338	0.03656	0.36632	0.37034	0.42579	0.47352	0.44746	0.67865	0.16111	0.38511	0.41526
MANTOVANI_NFKB_TARGETS_UP	57	0.9364	0.13647	0.99519	0.005	1	0.46136	0.10706	0.005	0.71713	0.38496	0.5478	0.23932	0.60257	0.42756	0.2668	0.24681	0.46316	0.26364
RASHI_NFKB1_TARGETS	27	0.03299	0.25935	0.03755	0.27067	0.18342	0.37958	0.0047	0.33296	0.1018	0.005	0.06878	0.26895	0.68153	0.3302	0.0498	0.33296	0.5938	0.41526
REACTOME_NFKB_ACTIVATION_THROUGH_FADD_RIP1_PATHWAY_MEDIATED_BY_CASPASE_8_AND10	22	0.18016	0.29	0.05943	0.31746	0.27889	0.29572	0.79329	0.26067	0.37728	0.45409	0.66081	0.50192	0.68153	0.40628	0.52387	0.005	0.83382	0.41526
REACTOME_NFKB_AND_MAP_KINASES_ACTIVATION_MEDIATED_BY_TLR4_SIGNALING_REPERTOIRE	103	0.52946	0.005	0.19988	0.39243	0.93294	0.005	0.03117	0.38552	0.35115	0.35	0.81587	0.41429	0.9418	0.14262	0.4166	0.36893	0.64661	0.41526
REACTOME_NFKB_IS_ACTIVATED_AND_SIGNALS_SURVIVAL	14	0.03924	0.48675	0.37686	0.31746	0.44688	0.43333	0.20152	0.005	0.23498	0.38496	0.42908	0.30168	0.67462	0.44704	0.35609	0.29813	0.29113	0.45244
REACTOME_P75NTR_SIGNALS_VIA_NFKB	20	0.02478	0.48505	0.14954	0.39243	0.19363	0.29572	0.38063	0.075	0.22797	0.34907	0.47915	0.26895	0.81503	0.40628	0.46515	0.42182	0.49559	0.45378
REACTOME_RIP_MEDIATED_NFKB_ACTIVATION_VIA_DAI	14	0.71203	0.41165	0.36426	0.44907	0.59544	0.26852	0.57458	0.34613	0.09629	0.33296	0.94833	0.005	0.67462	0.46942	0.16338	0.24681	0.26199	0.43028
REACTOME_TAK1_ACTIVATES_NFKB_BY_PHOSPHORYLATION_AND_ACTIVATION_OF_IKKS_COMPLEX	23	0.31965	0.2626	0.31287	0.32845	0.797	0.1871	0.5234	0.38125	0.00312	0.24681	0.98787	0.4168	0.63933	0.45209	0.23012	0.4413	0.34208	0.41429
REACTOME_TRAF6_MEDIATED_INDUCTION_OF_NFKB_AND_MAP_KINASES_UPON_TLR7_8_OR_9_ACTIVATION	101	0.22777	0.005	0.14158	0.40723	0.86049	0.005	0.01759	0.3893	0.22138	0.35	0.64847	0.42841	0.91372	0.15859	0.4166	0.36893	0.64104	0.41526
REACTOME_TRAF6_MEDIATED_NFKB_ACTIVATION	26	0.10101	0.29	0.14954	0.39243	0.3886	0.35843	0.68057	0.33296	0.2121	0.48333	0.9425	0.42841	0.76647	0.47825	1	0.43851	0.96727	0.41526
* SCHOEN_NFKB_SIGNALING	68	0.04374	0.005	0.29139	0.3625	0.24716	0.005	0.00729	0.005	0.15612	0.005	0.05008	0.24167	0.00994	0.42756	0.24246	0.33296	0.01983	0.34845
TIAN_TNF_SIGNALING_NOT_VIA_NFKB	31	0.00062	0.23957	0.00746	0.23993	0.05022	0.34482	0.0012	0.15379	0.03113	0.34907	0.00055	0.29885	0.94888	0.42756	0.03894	0.38902	0.64661	0.45378
TIAN_TNF_SIGNALING_VIA_NFKB	35	0.01937	0.005	0.19937	0.43721	0.00813	0.005	0.04971	0.33296	0.01869	0.005	0.28501	0.38839	0.10169	0.35636	0.1885	0.005	0.5938	0.43028
WANG_NFKB_TARGETS	15	1	0.25165	0.99999	0.19595	1	0.005	0.45148	0.43656	0.01837	0.37143	0.00804	0.35055	0.9154	0.45415	1	0.24681	0.867	0.25588
PID_NFKAPPABATYPICALPATHWAY	20	0.26047	0.44275	0.95636	0.3474	0.36922	0.44779	0.79329	0.40515	0.32365	0.44856	0.77835	0.45312	0.85153	0.47643	1	0.43057	0.88018	0.41526
PID_NFKAPPABCANONICALPATHWAY	36	0.0203	0.39545	0.65061	0.4176	0.19202	0.4038	0.58383	0.34613	0.48296	0.34907	0.99993	0.2784	0.85635	0.42756	0.18195	0.40545	0.89441	0.41526
REACTOME_ACTIVATION_OF_NF_KAPPAB_IN_B_CELLS	63	0.0004	0.005	0.01125	0.19595	0.03391	0.29572	0.04089	0.16571	0.35088	0.33178	0.02454	0.005	0.05912	0.40628	0.00022	0.075	0.03901	0.25588
AP1
* MATTHEWS_AP1_TARGETS	34	0.00633	0.005	0.19937	0.31746	0.1217	0.29572	0.00155	0.005	0.95301	0.35	0.11244	0.005	0.85153	0.3874	0.82779	0.29813	0.99582	0.25588
OZANNE_AP1_TARGETS_DN	13	0.75579	0.35525	0.73129	0.10357	0.69762	0.37958	0.06989	0.37854	0.60564	0.38496	0.44601	0.12609	0.08847	0.005	0.02005	0.36893	0.0026	0.40781
OZANNE_AP1_TARGETS_UP	32	0.03924	0.42267	0.92414	0.22218	0.18591	0.39545	0.0377	0.005	0.44116	0.43825	0.00619	0.30168	0.59136	0.42756	0.17058	0.4413	0.32786	0.3879
PID_AP1_PATHWAY	122	0.22933	0.2832	0.10893	0.31949	0.16521	0.4	0.00749	0.24756	0.75697	0.34907	0.87904	0.33143	0.11506	0.45873	0.70657	0.36893	0.05533	0.43092
REACTOME_ACTIVATION_OF_THE_AP1_FAMILY_OF_TRANSCRIPTION_FACTORS	19	0.98295	0.32126	0.99769	0.20714	1	0.17527	0.00196	0.35868	0.88837	0.39768	0.44146	0.40173	0.99006	0.39726	0.90276	0.42182	0.9057	0.4162
EGF/VEGF
ABE_VEGFA_TARGETS	24	0.0338	0.005	0.13978	0.41429	0.34687	0.005	0.28156	0.005	0.00282	0.005	0.19838	0.005	0.35121	0.005	0.83982	0.29	0.66464	0.005
* *ABE_VEGFA_TARGETS_2HR	40	0.00266	0.005	0.05425	0.46972	0.6411	0.29572	0.01772	0.005	0.45363	0.005	0.9121	0.26895	0.11766	0.39161	0.89756	0.36893	0.80915	0.3879
ABE_VEGFA_TARGETS_30MIN	27	0.52586	0.005	0.47159	0.43216	1	0.29572	0.09276	0.145	0.15612	0.14926	0.8494	0.16111	0.06627	0.39726	0.7328	0.16111	0.50224	0.29624
AMIT_EGF_RESPONSE_120_HELA	119	0.48304	0.005	0.06627	0.3474	0.06466	0.4	0.00102	0.075	0.00094	0.005	0.61876	0.33143	0.86344	0.42756	0.60292	0.45789	0.88018	0.45378
* AMIT_EGF_RESPONSE_120_MCF10A	70	1e-05	0.31401	0.04566	0.19595	0.00623	0.44893	0.0095	0.005	0.00318	0.005	0.09522	0.38839	0.46656	0.45648	0.01094	0.29	0.05358	0.46136
AMIT_EGF_RESPONSE_20_HELA	20	0.07314	0.005	0.3261	0.34524	0.01026	0.28504	0.0413	0.32053	0.70968	0.36632	0.14949	0.37179	0.76647	0.40628	0.70117	0.49525	0.79095	0.45762
AMIT_EGF_RESPONSE_20_MCF10A	40	0.26047	0.48505	0.24538	0.31949	0.27175	0.43333	0.24095	0.005	0.72892	0.37143	0.64261	0.28543	0.58826	0.45873	0.88741	0.36893	0.97949	0.37068
AMIT_EGF_RESPONSE_240_HELA	130	0.02869	0.43668	0.01939	0.28094	0.03914	0.44893	1e-05	0.005	0.01869	0.2755	1e-05	0.30168	0.00196	0.40628	0.70657	0.38902	0.9057	0.45789
AMIT_EGF_RESPONSE_240_MCF10A	38	0.27168	0.19902	0.24538	0.05305	0.77905	0.26852	0.00133	0.005	0.00827	0.005	0.00022	0.26895	0.29695	0.3874	0.23113	0.33296	0.46199	0.43028
AMIT_EGF_RESPONSE_40_HELA	72	0.34501	0.20519	0.22758	0.3474	0.65726	0.27982	0.0006	0.33296	0.2492	0.23641	0.06708	0.005	0.16141	0.44704	0.2286	0.36893	0.34208	0.3879
AMIT_EGF_RESPONSE_40_MCF10A	44	0.2323	0.31401	0.37315	0.31949	0.21695	0.39545	0.00109	0.15379	0.59309	0.34971	0.09573	0.14684	0.41029	0.44704	0.83543	0.43851	0.98438	0.45378
AMIT_EGF_RESPONSE_480_HELA	326	1e-05	0.31829	0.02614	0.39243	9e-05	0.4339	1e-05	0.33296	1e-05	0.42267	1e-05	0.32994	0.04358	0.42756	0.47604	0.48157	0.05786	0.43028
AMIT_EGF_RESPONSE_480_MCF10A	76	0.00559	0.005	0.10914	0.12609	0.00522	0.005	0.00176	0.34424	0.02824	0.33279	0.00323	0.23932	0.10169	0.3874	0.54834	0.24681	0.28817	0.25588
AMIT_EGF_RESPONSE_60_HELA	89	8e-05	0.2626	0.04633	0.005	0.00751	0.21535	0.00227	0.25588	0.35026	0.43004	0.00183	0.33833	0.52456	0.45448	1e-05	0.005	0.00596	0.005
* AMIT_EGF_RESPONSE_60_MCF10A	79	0.03236	0.005	0.16965	0.12609	0.2235	0.27982	1e-05	0.005	0.24514	0.005	1e-05	0.37889	0.43558	0.47825	0.90276	0.36893	0.89107	0.4162
BIOCARTA_EGF_PATHWAY	54	0.35971	0.31829	0.99769	0.16276	1	0.23476	0.06822	0.34731	0.23498	0.46807	0.11258	0.30168	0.24139	0.42756	1	0.41526	0.09855	0.41526
BIOCARTA_EGFR_SMRTE_PATHWAY	15	0.26469	0.35905	0.36516	0.16276	0.39706	0.38264	0.99987	0.3625	0.61786	0.38496	0.61876	0.42841	0.89466	0.3874	0.52387	0.30045	0.46316	0.41526
BIOCARTA_VEGF_PATHWAY	50	0.00123	0.33936	0.66865	0.19595	0.24716	0.29572	0.32382	0.32067	0.57748	0.34907	0.75654	0.41429	0.63933	0.44704	1	0.29813	0.70878	0.34845
BORLAK_LIVER_CANCER_EGF_UP	85	0.26469	0.31522	0.59277	0.44907	1	0.4	1e-05	0.22597	0.36144	0.39875	0.0532	0.42841	0.89466	0.40628	1	0.38779	0.98245	0.41526
EGFR_UP.V1_DN	274	0.52525	0.3625	0.88295	0.41429	0.61076	0.35629	0.37233	0.37991	0.56123	0.43923	0.92396	0.23932	0.9154	0.42756	0.67865	0.33296	0.80915	0.25588
EGFR_UP.V1_UP	334	1e-05	0.005	0.03356	0.19595	0.01026	0.29572	1e-05	0.005	0.00072	0.24681	0.00129	0.23138	0.01708	0.25	0.18867	0.4413	0.10688	0.3805
KEGG_VEGF_SIGNALING_PATHWAY	98	0.56728	0.48333	0.85597	0.45542	0.28059	0.40278	0.77034	0.38552	0.96894	0.005	0.81587	0.2142	0.68153	0.45448	0.82779	0.38902	0.9057	0.41526
KOBAYASHI_EGFR_SIGNALING_24HR_DN	377	1e-05	0.005	1e-05	0.005	1e-05	0.13034	1e-05	0.34613	0.83565	0.38496	0.0056	0.46277	1e-05	0.35636	0.60312	0.33296	1e-05	0.34845
KOBAYASHI_EGFR_SIGNALING_24HR_UP	171	0.38346	0.43668	0.10557	0.38902	0.37697	0.37958	1e-05	0.005	0.57748	0.42647	0.0065	0.005	0.85153	0.44704	0.98898	0.38902	0.56081	0.44058
KOBAYASHI_EGFR_SIGNALING_6HR_DN	35	0.00052	0.21682	0.00116	0.005	0.00507	0.005	1e-05	0.005	0.0329	0.005	0.00193	0.39311	0.9033	0.40628	0.01094	0.005	0.41567	0.25588
KOBAYASHI_EGFR_SIGNALING_6HR_UP	12	0.42722	0.35525	0.00171	0.005	0.00416	0.38264	0.54176	0.32067	0.00369	0.19863	0.01218	0.41429	0.33409	0.35636	0.01098	0.005	0.00216	0.25588
NAGASHIMA_EGF_SIGNALING_UP	84	0.01922	0.33646	0.00531	0.31949	0.01588	0.38264	1e-05	0.15379	1e-05	0.005	0.00425	0.14684	0.90807	0.40628	0.03186	0.36893	0.89441	0.45789
PID_VEGF_VEGFR_PATHWAY	21	0.80383	0.4202	0.81514	0.005	1	0.203	0.30168	0.38552	0.83565	0.33279	0.46958	0.36813	0.22069	0.44704	0.82137	0.24681	0.59091	0.34845
PID_VEGFR1_2_PATHWAY	120	0.56107	0.29	0.62018	0.38382	0.48143	0.29572	0.17524	0.21267	0.91883	0.20714	0.99993	0.005	0.83987	0.40738	0.82779	0.38902	0.9057	0.41526
PID_VEGFR1_PATHWAY	48	0.40992	0.44058	0.74315	0.20174	0.97593	0.40819	0.0047	0.35868	0.72689	0.39206	0.66081	0.44945	0.0954	0.40628	0.65137	0.16111	0.05533	0.36527
REACTOME_EGFR_DOWNREGULATION	41	0.02023	0.29	0.18784	0.16276	0.59544	0.38264	0.79988	0.38552	1	0.34971	0.83916	0.41429	0.68153	0.40628	0.52387	0.4986	0.86775	0.25588
REACTOME_SHC1_EVENTS_IN_EGFR_SIGNALING	29	0.13517	0.44321	0.76864	0.40451	0.73386	0.38264	0.29859	0.145	0.92523	0.34476	0.35708	0.005	0.12078	0.48502	0.91625	0.41038	0.10704	0.30526
REACTOME_SIGNALING_BY_CONSTITUTIVELY_ACTIVE_EGFR	31	0.00062	0.35905	0.74754	0.23993	0.21183	0.35629	0.20853	0.33296	0.57748	0.34907	0.22574	0.32222	0.01199	0.40628	0.70657	0.39227	0.05358	0.41526
REACTOME_SIGNALING_BY_EGFR_IN_CANCER	164	0.04886	0.4234	0.18843	0.46113	0.52103	0.10875	0.02441	0.35868	0.96343	0.005	0.3188	0.30168	0.26106	0.005	0.44608	0.42182	0.06033	0.34845
REACTOME_VEGF_LIGAND_RECEPTOR_INTERACTIONS	22	0.56107	0.38536	0.74543	0.005	1	0.12083	0.11449	0.33296	0.77335	0.37143	0.35708	0.30168	0.16584	0.40628	0.78685	0.16111	0.30047	0.005
VEGF_A_UP.V1_DN	327	0.12531	0.28779	0.24377	0.005	0.23827	0.29572	0.03795	0.34693	0.9904	0.4339	0.94833	0.41429	0.68153	0.15859	1	0.43851	0.98572	0.34845
VEGF_A_UP.V1_UP	171	0.84603	0.43047	0.83666	0.40723	1	0.43446	0.51868	0.515	0.96894	0.43774	0.98787	0.50851	0.98311	0.40628	0.99219	0.48333	0.99366	0.42076
WESTON_VEGFA_TARGETS	135	0.59862	0.22009	0.83666	0.27707	0.93294	0.203	0.01103	0.005	0.28731	0.06692	0.02856	0.005	0.48194	0.46942	1	0.21554	0.9057	0.27697
WESTON_VEGFA_TARGETS_12HR	44	0.05235	0.005	0.62018	0.40451	0.27231	0.005	0.09276	0.005	0.51576	0.42267	0.22036	0.005	0.04517	0.26364	0.70657	0.42987	0.57527	0.4287
WESTON_VEGFA_TARGETS_3HR	94	0.85349	0.49525	0.92746	0.23993	0.93294	0.27936	0.20152	0.33296	0.54768	0.06692	0.27315	0.005	0.85635	0.42756	1	0.005	0.9057	0.41526
WESTON_VEGFA_TARGETS_6HR	79	0.32812	0.005	0.74508	0.42815	0.797	0.005	0.0102	0.005	0.35498	0.38483	0.0103	0.005	0.34575	0.27697	1	0.38902	0.9518	0.43327
ZWANG_CLASS_1_TRANSIENTLY_INDUCED_BY_EGF	686	1e-05	0.46209	0.02584	0.45111	0.01015	0.44893	1e-05	0.37545	1e-05	0.005	0.00179	0.13716	0.76539	0.45873	0.4098	0.38902	0.86775	0.45378
ZWANG_CLASS_2_TRANSIENTLY_INDUCED_BY_EGF	69	0.27168	0.33936	0.45582	0.40451	0.56574	0.4151	0.00028	0.32067	0.25525	0.38341	0.62714	0.38839	0.60131	0.49671	0.09613	0.34927	0.07154	0.43028
ZWANG_CLASS_3_TRANSIENTLY_INDUCED_BY_EGF	356	1e-05	0.2626	0.00925	0.33462	0.00061	0.37958	1e-05	0.005	1e-05	0.005	0.00022	0.36813	0.62108	0.44704	0.0213	0.16111	0.30765	0.43028
ZWANG_DOWN_BY_2ND_EGF_PULSE	244	0.85637	0.50699	0.6268	0.39842	0.5243	0.40837	0.58351	0.40978	0.14418	0.42647	0.85634	0.38839	0.78824	0.24167	0.17515	0.14746	0.96298	0.41526
ZWANG_EGF_INTERVAL_DN	270	0.3029	0.4202	0.89088	0.46113	0.58612	0.38264	0.00874	0.38667	0.19612	0.40311	0.00193	0.41429	0.99006	0.005	1	0.50192	0.99582	0.005
ZWANG_EGF_INTERVAL_UP	72	0.98361	0.44907	0.02614	0.27129	0.34029	0.38264	0.62316	0.35178	0.92523	0.42942	0.62053	0.30168	0.95489	0.42292	0.9498	0.36893	0.89107	0.41526
ZWANG_EGF_PERSISTENTLY_DN	65	0.73463	0.41165	0.44666	0.38382	0.65726	0.4	0.03977	0.3678	0.92523	0.42267	8e-05	0.38839	0.94106	0.40331	1	0.38902	0.99366	0.005
ZWANG_EGF_PERSISTENTLY_UP	51	0.01664	0.325	0.04317	0.39243	0.35519	0.40837	0.51652	0.26067	1	0.42647	0.7573	0.36632	0.00196	0.40628	1	0.38902	0.02717	0.34845
ZWANG_TRANSIENTLY_UP_BY_1ST_EGF_PULSE_ONLY	1938	0.64379	0.24167	0.85134	0.45542	0.93221	0.32914	0.12604	0.34731	0.08752	0.33697	0.05723	0.42841	0.94888	0.29309	1	0.38902	0.99582	0.32551
ZWANG_TRANSIENTLY_UP_BY_2ND_EGF_PULSE_ONLY	864	1	0.41942	0.99999	0.22218	1	0.005	0.99987	0.005	1	0.22809	0.99993	0.12609	0.99395	0.005	1	0.005	0.99907	0.005
ROS
HOUSTIS_ROS	38	0.14463	0.19902	0.66191	0.11941	0.07199	0.43333	8e-05	0.005	0.01846	0.34971	0.00642	0.005	0.18331	0.35636	0.70214	0.38902	0.69198	0.43668
MOOTHA_ROS	7	0.18732	0.29	0.89229	0.40451	0.34029	0.35843	0.99987	0.37545	0.15612	0.38496	0.75654	0.38839	0.85981	0.40628	0.70657	0.3549	0.89107	0.43557
CELL CYCLE
BIOCARTA_CELLCYCLE_PATHWAY	39	0.01443	0.29	0.00013	0.005	0.05248	0.005	0.33473	0.38552	0.68245	0.38496	0.77835	0.26895	0.03444	0.35636	0.45295	0.24681	0.08293	0.26364
CELL_CYCLE_ARREST_GO_0007050	89	0.00693	0.38794	0.18784	0.31949	0.00117	0.38264	0.78698	0.34613	0.22797	0.34907	0.05693	0.30168	0.16141	0.40628	0.03732	0.38902	0.02505	0.4261
CELL_CYCLE_CHECKPOINT_GO_0000075	75	0.38494	0.31522	0.14402	0.005	0.44067	0.29572	0.91741	0.35868	0.48572	0.44291	0.20236	0.51678	0.2445	0.35636	0.1536	0.33296	0.29767	0.34845
CELL_CYCLE_GO_0007049	416	0.02023	0.28779	0.0174	0.20174	0.03619	0.32914	0.13461	0.34731	0.23498	0.36632	0.01893	0.40173	0.03333	0.35636	0.023	0.3549	0.02459	0.34845
CELL_CYCLE_PHASE	227	0.22777	0.38794	0.08256	0.24507	0.14911	0.32914	0.05402	0.38552	0.33604	0.36632	0.01438	0.54	0.34575	0.40628	0.95001	0.38902	0.44517	0.41526
CELL_CYCLE_PROCESS	256	0.15958	0.51858	0.05159	0.24507	0.13069	0.38264	0.04353	0.38552	0.25525	0.38496	0.06383	0.41429	0.24973	0.39726	0.79674	0.38902	0.32588	0.3805
G1_PHASE_OF_MITOTIC_CELL_CYCLE	24	0.50935	0.41942	0.22221	0.43444	0.20869	0.40837	0.67441	0.37545	0.46266	0.33296	0.72666	0.40173	0.20045	0.40628	0.26221	0.005	0.38511	0.30526
INTERPHASE_OF_MITOTIC_CELL_CYCLE	97	0.00093	0.35525	0.04598	0.005	1e-05	0.38264	0.10308	0.3625	0.14945	0.39768	0.05631	0.32994	0.19104	0.40628	0.36979	0.24681	0.10796	0.38667
KEGG_CELL_CYCLE	180	1e-05	0.17151	1e-05	0.005	1e-05	0.005	0.01384	0.37545	0.59309	0.39087	0.08331	0.40173	0.00104	0.005	0.02928	0.24681	0.00017	0.3335
M_PHASE_OF_MITOTIC_CELL_CYCLE	114	0.90622	0.47464	0.33078	0.28094	0.5554	0.435	0.02529	0.34613	0.38658	0.33296	8e-05	0.41429	0.58836	0.40738	1	0.45789	0.94432	0.46986
MITOTIC_CELL_CYCLE	222	0.05235	0.525	0.03371	0.20174	0.00418	0.38264	0.0006	0.34613	0.16801	0.36632	0.00015	0.4765	0.08662	0.35636	0.60292	0.38902	0.58511	0.34845
MITOTIC_CELL_CYCLE_CHECKPOINT	32	0.98361	0.46185	0.68526	0.46113	0.677	0.4038	0.31111	0.34613	0.5669	0.33697	0.07327	0.45735	0.5768	0.35636	0.95001	0.36893	0.99582	0.34845
NEGATIVE_REGULATION_OF_CELL_CYCLE	120	0.00158	0.38794	0.3137	0.39726	0.00095	0.38264	0.67441	0.37286	0.22071	0.34907	0.0532	0.33143	0.19104	0.40628	0.05058	0.48161	0.42012	0.45378
POSITIVE_REGULATION_OF_CELL_CYCLE	25	0.4507	0.41862	0.73129	0.40992	0.797	0.39545	0.2723	0.3625	1	0.35426	0.2276	0.45542	0.62241	0.25	0.15077	0.33296	0.01665	0.005
REACTOME_CELL_CYCLE	469	1e-05	0.005	1e-05	0.005	1e-05	0.005	0.04854	0.40515	0.93996	0.42647	0.91671	0.41429	1e-05	0.25	0.00119	0.33296	1e-05	0.34845
REACTOME_CELL_CYCLE_CHECKPOINTS	139	1e-05	0.005	1e-05	0.005	9e-05	0.005	0.32518	0.35407	0.92523	0.34971	0.32351	0.29225	1e-05	0.005	0.00079	0.16111	1e-05	0.25588
REACTOME_CELL_CYCLE_MITOTIC	397	8e-05	0.005	1e-05	0.005	1e-05	0.005	0.01698	0.38552	0.74218	0.38496	0.87904	0.43446	1e-05	0.25	0.00558	0.24681	1e-05	0.34845
REGULATION_OF_CELL_CYCLE	261	0.0368	0.33886	0.02892	0.20174	0.05209	0.29572	0.65978	0.005	0.31723	0.30381	0.00425	0.3307	0.06489	0.35636	0.00638	0.35753	0.04732	0.34845
REGULATION_OF_MITOTIC_CELL_CYCLE	38	0.06746	0.42411	0.59277	0.22218	0.01548	0.38264	0.00228	0.40428	0.53121	0.36453	0.17322	0.41928	0.23402	0.3302	0.70657	0.36893	0.56064	0.38531
PROLIFERATION
ROSTY_CERVICAL_CANCER_PROLIFERATION_CLUSTER	213	0.00145	0.28779	1e-05	0.12609	0.00088	0.29572	1e-05	0.34613	1	0.42879	1e-05	0.49351	0.00026	0.35636	1	0.38902	0.32621	0.34845
ACOSTA_PROLIFERATION_INDEPENDENT_MYC_TARGETS_DN	149	0.17982	0.33212	0.46077	0.005	0.50826	0.10875	0.00497	0.005	0.09883	0.43923	0.02588	0.005	0.82742	0.46757	0.46515	0.38902	0.43932	0.45378
ACOSTA_PROLIFERATION_INDEPENDENT_MYC_TARGETS_UP	116	0.11626	0.3474	0.12218	0.24507	0.15176	0.29572	0.25631	0.33296	0.09157	0.31168	0.00015	0.005	0.68153	0.43008	0.17912	0.29	0.0267	0.41526
BENPORATH_PROLIFERATION	221	0.00175	0.20519	0.00013	0.005	1e-05	0.29572	0.00065	0.40978	0.7566	0.36632	0.37479	0.36632	1e-05	0.25	0.78685	0.24681	9e-05	0.34845
CELL_PROLIFERATION_GO_0008283	597	0.03924	0.12083	0.00114	0.22835	0.22184	0.005	0.0012	0.38419	0.52631	0.16338	0.20528	0.23932	0.68153	0.41919	0.78685	0.45789	0.69982	0.41526
ENDOTHELIAL_CELL_PROLIFERATION	21	0.41256	0.44275	0.88656	0.27129	0.56898	0.005	0.19406	0.40247	0.57041	0.45409	0.73393	0.42579	0.70554	0.39357	0.18195	0.43562	0.84242	0.43557
FIRESTEIN_PROLIFERATION	222	0.17982	0.3774	0.6268	0.42004	0.5554	0.38264	0.67441	0.38552	0.97325	0.34907	0.9681	0.42841	0.23568	0.40628	0.27159	0.43851	0.04732	0.38667
GOLDRATH_HOMEOSTATIC_PROLIFERATION	264	1e-05	0.30728	0.01126	0.19595	1e-05	0.3494	0.00098	0.005	0.69995	0.34907	0.00055	0.005	0.00048	0.40628	0.03194	0.36893	9e-05	0.41526
PEART_HDAC_PROLIFERATION_CLUSTER_DN	113	0.42722	0.24167	0.1259	0.23993	0.11682	0.13034	0.2723	0.34654	0.02929	0.37143	0.19662	0.38839	0.01803	0.005	0.29849	0.24681	0.00596	0.005
PEART_HDAC_PROLIFERATION_CLUSTER_UP	84	0.29379	0.32222	0.12218	0.19595	0.21905	0.29572	0.00034	0.18125	0.00108	0.33296	0.02588	0.35055	0.99006	0.45173	0.91666	0.36893	0.74625	0.45244
POSITIVE_REGULATION_OF_EPITHELIAL_CELL_PROLIFERATION	16	0.56036	0.45279	0.54635	0.45542	0.65056	0.46481	0.44063	0.38667	0.33813	0.34971	0.17084	0.30168	0.73499	0.45415	0.67865	0.43851	0.52098	0.38667
REGULATION_OF_CELL_PROLIFERATION	373	0.04989	0.42411	0.02588	0.40451	0.34352	0.41102	0.07511	0.32067	0.68948	0.42647	0.29204	0.32422	0.31507	0.3625	0.36383	0.45789	0.14483	0.40781
REGULATION_OF_T_CELL_PROLIFERATION	14	0.31965	0.4234	0.05159	0.4715	0.34782	0.41102	0.02205	0.35178	0.04154	0.36632	0.05693	0.30168	0.9154	0.42292	0.86571	0.4655	0.98313	0.42076
T_CELL_PROLIFERATION	17	0.65312	0.4234	0.17711	0.40992	0.797	0.46823	0.00506	0.33296	0.00763	0.2755	0.0116	0.26895	0.9154	0.32887	0.72037	0.38902	0.89441	0.45
REPLICATION
REACTOME_HOMOLOGOUS_RECOMBINATION_REPAIR_OF_REPLICATION_INDEPENDENT_DOUBLE_STRAND_BREAKS	26	0.22594	0.32222	0.88295	0.30945	0.56231	0.38264	0.78999	0.37545	0.54768	0.32658	0.5478	0.43446	0.38112	0.29309	0.09269	0.3649	0.70456	0.16812
REACTOME_ACTIVATION_OF_ATR_IN_RESPONSE_TO_REPLICATION_STRESS	55	1e-05	0.005	0.00022	0.005	0.00017	0.005	0.99987	0.38552	1	0.38496	0.99993	0.32994	1e-05	0.005	0.00072	0.33296	1e-05	0.25588
* DNA_DEPENDENT_DNA_REPLICATION	66	0.02885	0.005	0.1676	0.005	0.00093	0.005	0.15921	0.38552	0.69484	0.34971	0.77835	0.24167	0.04795	0.005	0.15437	0.33296	0.1169	0.25588
DNA_REPLICATION	120	1e-05	0.005	0.07226	0.005	0.00072	0.005	0.00895	0.41877	0.34229	0.32783	0.87904	0.32422	0.04535	0.005	0.03432	0.33296	0.04732	0.005
DNA_REPLICATION_INITIATION	20	0.04355	0.17151	0.20785	0.005	0.15007	0.005	0.65978	0.38125	0.23373	0.32783	0.75654	0.24167	0.04517	0.005	0.11989	0.30045	0.23131	0.005
KAUFFMANN_DNA_REPLICATION_GENES	198	1e-05	0.13182	0.00196	0.005	0.00223	0.13034	0.99987	0.35868	0.57748	0.43004	0.99993	0.43446	0.04064	0.005	1e-05	0.005	1e-05	0.005
KEGG_DNA_REPLICATION	48	1e-05	0.005	1e-05	0.005	1e-05	0.005	0.99987	0.37545	1	0.39087	0.99993	0.44574	1e-05	0.005	0.00684	0.24681	1e-05	0.005
NEGATIVE_REGULATION_OF_DNA_REPLICATION	14	0.01376	0.17151	0.25859	0.005	0.00813	0.005	0.13155	0.37991	0.31723	0.32783	0.33777	0.24167	0.08735	0.005	0.20817	0.33296	0.30765	0.34845
REACTOME_ASSOCIATION_OF_LICENSING_FACTORS_WITH_THE_PRE_REPLICATIVE_COMPLEX	11	0.11954	0.17151	0.05943	0.005	0.00826	0.203	0.09276	0.34424	0.1319	0.26907	0.00695	0.005	0.03529	0.005	0.35108	0.33296	0.00811	0.005
REACTOME_DNA_REPLICATION	220	1e-05	0.005	1e-05	0.005	1e-05	0.005	0.20198	0.4	0.88422	0.37005	0.81587	0.32994	1e-05	0.25	0.01844	0.33296	1e-05	0.34845
REACTOME_E2F_ENABLED_INHIBITION_OF_PRE_REPLICATION_COMPLEX_FORMATION	15	0.03112	0.24167	0.04566	0.19595	0.22358	0.005	0.52939	0.34613	0.92523	0.33697	0.33777	0.18547	0.03853	0.35636	0.99973	0.38902	0.10796	0.37593
REACTOME_E2F_MEDIATED_REGULATION_OF_DNA_REPLICATION	53	0.00498	0.17151	0.00517	0.005	0.01074	0.005	0.67441	0.4	0.65553	0.37143	0.57236	0.37889	0.00196	0.005	0.41354	0.33296	0.00811	0.005
REACTOME_INHIBITION_OF_REPLICATION_INITIATION_OF_DAMAGED_DNA_BY_RB1_E2F1	18	0.10111	0.005	0.11378	0.08735	0.14222	0.005	0.99338	0.3625	0.78243	0.38965	0.9681	0.45925	0.28588	0.005	0.21029	0.30045	0.23726	0.005
REACTOME_SLBP_DEPENDENT_PROCESSING_OF_REPLICATION_DEPENDENT_HISTONE_PRE_MRNAS	10	0.1044	0.19902	0.85459	0.42411	0.03528	0.22524	0.65978	0.37991	0.32042	0.34907	0.10715	0.005	0.37161	0.4934	0.17912	0.33296	0.03694	0.43028
REGULATION_OF_DNA_REPLICATION	26	0.42278	0.17938	0.54352	0.05305	0.28059	0.23476	0.14506	0.40515	0.54028	0.26907	0.5478	0.18547	0.04795	0.005	0.30306	0.33296	0.24761	0.005
ADHESION
CALCIUM_INDEPENDENT_CELL_CELL_ADHESION	12	0.12949	0.25935	0.3137	0.34524	0.23727	0.44893	0.32518	0.3625	0.59665	0.39875	0.87904	0.45925	0.9154	0.40628	0.88187	0.38902	0.94694	0.4294
CELL_CELL_ADHESION	105	0.98387	0.005	0.97957	0.12609	1	0.005	0.79329	0.005	0.78243	0.44656	0.9681	0.38839	0.94888	0.42756	0.70657	0.43562	0.88385	0.41526
CELL_MATRIX_ADHESION	48	0.98361	0.17938	0.90408	0.27129	1	0.35202	0.99703	0.35868	0.57748	0.37143	0.98787	0.24167	0.33928	0.40628	0.26862	0.38902	0.02742	0.41526
CELL_SUBSTRATE_ADHESION	48	0.98361	0.17938	0.90408	0.27129	1	0.35202	0.99703	0.35868	0.57748	0.37143	0.98787	0.24167	0.33928	0.40628	0.26862	0.38902	0.02699	0.41526
FOCAL_ADHESION	12	0.85873	0.36751	0.74315	0.3625	0.59485	0.40837	0.29737	0.3625	0.88422	0.36632	0.5034	0.38839	0.44888	0.42756	1	0.36893	0.83922	0.45378
FOCAL_ADHESION_FORMATION	13	1	0.12083	0.99999	0.27129	1	0.1871	0.99987	0.44536	0.93996	0.43825	0.99993	0.22065	0.14557	0.005	0.1152	0.005	0.01234	0.005
HETEROPHILIC_CELL_ADHESION	12	0.98387	0.22009	0.99737	0.16276	1	0.27982	0.66835	0.48671	0.93996	0.54	0.77835	0.30168	0.87551	0.40628	0.70657	0.47445	0.9057	0.41526
HOMOPHILIC_CELL_ADHESION	22	0.98387	0.40278	0.78996	0.005	1	0.32914	0.28882	0.3625	0.58456	0.33279	0.5478	0.29225	0.68153	0.42292	0.43134	0.48161	0.86235	0.3805
KEGG_CELL_ADHESION_MOLECULES_CAMS	158	1	0.33936	0.85597	0.36432	1	0.29572	0.92823	0.29624	0.9904	0.36632	0.99993	0.26478	0.82742	0.45209	1	0.29813	0.34208	0.41904
KEGG_FOCAL_ADHESION	312	0.83794	0.46209	0.99769	0.35311	1	0.4339	0.00948	0.33296	0.95301	0.46113	0.22574	0.40173	0.40646	0.42292	1	0.41814	0.66909	0.43028
POSITIVE_REGULATION_OF_CELL_ADHESION	17	0.00882	0.32768	0.44666	0.32845	0.01692	0.37826	0.03795	0.40978	0.77335	0.46113	0.17978	0.42841	0.89466	0.40331	0.95001	0.53	0.89107	0.38667
REACTOME_APOPTOTIC_CLEAVAGE_OF_CELL_ADHESION_PROTEINS	16	0.11111	0.35525	0.06627	0.36432	0.53764	0.38264	0.74393	0.34118	0.61801	0.33279	0.77835	0.38839	0.97738	0.005	0.46476	0.29813	0.70403	0.3879
REACTOME_PLATELET_ADHESION_TO_EXPOSED_COLLAGEN	11	0.61175	0.44532	0.64909	0.26453	0.9014	0.39545	0.03795	0.24756	0.35088	0.30381	0.84603	0.18547	0.5006	0.39726	0.04048	0.005	0.00998	0.005
REGULATION_OF_CELL_ADHESION	52	0.54894	0.4	0.29126	0.45312	0.16521	0.43333	0.00599	0.3625	0.62898	0.32658	0.23786	0.23918	0.76647	0.42756	0.95001	0.42182	0.62608	0.41526
REGULATION_OF_CELL_CELL_ADHESION	18	0.38211	0.35898	0.37926	0.2972	0.75843	0.203	0.25309	0.35868	0.34229	0.31168	0.61404	0.32422	0.18697	0.15859	0.18867	0.005	0.04323	0.005
MIGRATION
CELL_MIGRATION	119	0.68158	0.42267	0.74508	0.005	1	0.31071	0.79329	0.34613	0.77497	0.38496	0.24054	0.36632	0.15103	0.48164	1	0.36893	0.41567	0.45244
ENDOTHELIAL_CELL_MIGRATION	11	0.93508	0.325	0.88656	0.34524	0.93714	0.40837	0.15983	0.35868	0.92523	0.39206	0.06595	0.38839	0.68153	0.40628	1	0.45789	0.9057	0.41526
LEUKOCYTE_MIGRATION	18	0.80383	0.34524	0.74315	0.33886	0.64769	0.3494	0.50185	0.33296	0.25525	0.005	0.5478	0.45542	0.53429	0.005	0.4381	0.33296	0.70403	0.18643
REGULATION_OF_CELL_MIGRATION	41	0.56107	0.33886	0.44666	0.32845	0.797	0.203	0.95493	0.33296	0.76677	0.34907	0.86093	0.38839	0.08847	0.40628	0.70117	0.43851	0.69982	0.41526
WU_CELL_MIGRATION	348	0.00023	0.31401	0.03371	0.23993	0.0034	0.32914	1e-05	0.005	0.00068	0.43923	1e-05	0.22065	0.85153	0.42756	1	0.40048	0.98342	0.4261
INVASION
BERTUCCI_INVASIVE_CARCINOMA_DUCTAL_VS_LOBULAR_DN	31	0.08556	0.38794	0.54635	0.40451	0.53459	0.39956	0.45501	0.33296	0.44575	0.43923	0.2585	0.30168	0.89466	0.47825	0.91378	0.42987	0.74662	0.42076
BERTUCCI_INVASIVE_CARCINOMA_DUCTAL_VS_LOBULAR_UP	32	0.07015	0.35525	0.6623	0.45542	0.65651	0.35202	0.99987	0.40338	0.98907	0.20714	0.99993	0.33778	0.95489	0.40331	0.36121	0.49525	0.61552	0.43327
GOUYER_TUMOR_INVASIVENESS	13	0.53905	0.20519	0.06627	0.005	0.1059	0.005	0.64172	0.33143	0.59309	0.005	0.15845	0.005	0.70081	0.40628	1	0.44353	0.99366	0.14032
OUELLET_OVARIAN_CANCER_INVASIVE_VS_LMP_DN	25	0.88138	0.50368	0.74315	0.27707	0.87615	0.39956	0.25232	0.40978	0.95301	0.43825	0.47664	0.45542	0.20337	0.3625	0.70657	0.45789	0.23917	0.49671
OUELLET_OVARIAN_CANCER_INVASIVE_VS_LMP_UP	164	0.0004	0.13647	0.06743	0.44321	0.00331	0.29572	1e-05	0.005	0.34809	0.005	1e-05	0.005	1e-05	0.005	0.56771	0.16111	0.0408	0.005
POOLA_INVASIVE_BREAST_CANCER_DN	205	1	0.12083	0.88295	0.41429	1	0.005	0.73332	0.44772	0.59309	0.37005	0.49247	0.32422	0.95489	0.47294	1	0.48161	0.99366	0.43028
POOLA_INVASIVE_BREAST_CANCER_UP	313	0.29786	0.3474	0.73129	0.39243	0.93294	0.38264	0.00228	0.34613	1	0.34907	0.79336	0.32994	0.02905	0.35636	1	0.46161	0.80381	0.34845
* RIZKI_TUMOR_INVASIVENESS_2D_DN	61	0.03169	0.3625	0.44666	0.41429	0.08064	0.38264	0.00203	0.005	0.89254	0.33296	0.70432	0.38839	0.33593	0.40628	0.52387	0.32366	0.14483	0.3879
RIZKI_TUMOR_INVASIVENESS_2D_UP	76	0.47011	0.29195	0.18778	0.48668	0.34782	0.005	0.58351	0.38125	0.44116	0.33178	0.24572	0.33833	0.85981	0.40628	0.89939	0.38902	0.56081	0.3805
RIZKI_TUMOR_INVASIVENESS_3D_DN	306	0.26469	0.35891	0.04207	0.26	0.11602	0.37445	0.18197	0.33296	0.77335	0.22809	0.49402	0.32222	0.31312	0.45648	0.86571	0.43851	0.57715	0.41526
RIZKI_TUMOR_INVASIVENESS_3D_UP	263	0.37947	0.44532	0.78294	0.32584	0.93221	0.35202	0.88668	0.44772	0.87779	0.22809	0.75385	0.41429	0.95642	0.40628	1	0.43809	0.89107	0.43668
WANG_TUMOR_INVASIVENESS_DN	343	0.00998	0.005	0.20174	0.005	0.00615	0.005	0.00105	0.3625	0.93996	0.22025	0.09644	0.3307	0.01421	0.42756	0.11721	0.43057	0.00039	0.41526
WANG_TUMOR_INVASIVENESS_UP	524	0.00035	0.29	0.00031	0.19595	1e-05	0.37958	0.00495	0.35868	0.15764	0.51678	0.00353	0.23932	0.00014	0.40628	1e-05	0.005	1e-05	0.15859
CELLULAR STRESS
BIOCARTA_STRESS_PATHWAY	39	0.44346	0.35891	0.16272	0.26453	0.70551	0.4	0.43821	0.35868	0.03157	0.37672	0.98787	0.37889	0.95043	0.40628	0.78685	0.3649	0.80144	0.41526
CELLULAR_RESPONSE_TO_STRESS	9	0.41551	0.36589	0.64841	0.42004	0.90104	0.37958	0.82408	0.35868	0.78243	0.34971	0.5478	0.32422	0.85153	0.40628	0.54586	0.38902	0.64661	0.43668
CHUANG_OXIDATIVE_STRESS_RESPONSE_DN	18	0.72309	0.17151	0.3059	0.377	0.57996	0.29572	0.24095	0.3625	0.92523	0.34907	0.19419	0.45735	0.66437	0.35636	0.53042	0.4408	0.18703	0.34845
CHUANG_OXIDATIVE_STRESS_RESPONSE_UP	49	0.04376	0.31401	0.07005	0.38045	0.5243	0.41914	0.00045	0.005	0.00318	0.38483	1e-05	0.005	0.95489	0.42292	1	0.38158	0.9057	0.42076
KYNG_ENVIRONMENTAL_STRESS_RESPONSE_NOT_BY_4NQO_IN_OLD	15	0.26469	0.32222	0.57714	0.39243	0.19196	0.41102	0.57379	0.40428	0.96248	0.38496	0.9681	0.41429	0.87489	0.44704	1	0.38902	0.99366	0.51
KYNG_ENVIRONMENTAL_STRESS_RESPONSE_NOT_BY_4NQO_IN_WS	54	0.26047	0.38794	0.44666	0.36432	0.0846	0.38264	0.40644	0.38552	0.3797	0.33296	0.13869	0.26895	0.81346	0.40628	0.02458	0.35468	0.10796	0.41429
KYNG_ENVIRONMENTAL_STRESS_RESPONSE_NOT_BY_GAMMA_IN_OLD	43	0.04065	0.4202	0.65061	0.45542	0.02639	0.44893	0.44703	0.515	0.93996	0.42942	0.27315	0.30168	0.21286	0.43682	0.52233	0.53	0.42688	0.45789
KYNG_ENVIRONMENTAL_STRESS_RESPONSE_NOT_BY_GAMMA_IN_WS	44	0.03236	0.32126	0.44666	0.39243	0.00813	0.41102	0.18197	0.35868	0.59309	0.37143	0.31506	0.38839	0.09661	0.005	0.70657	0.51858	0.70878	0.41526
KYNG_ENVIRONMENTAL_STRESS_RESPONSE_NOT_BY_UV_IN_OLD	39	0.17229	0.35898	0.84	0.31446	0.21875	0.45951	0.6186	0.15379	0.71738	0.48333	0.35708	0.42841	0.07055	0.1838	0.5179	0.38902	0.75471	0.45571
KYNG_ENVIRONMENTAL_STRESS_RESPONSE_NOT_BY_UV_IN_WS	12	0.41875	0.33936	0.78086	0.41255	0.52555	0.41102	0.69429	0.42248	0.93996	0.43923	0.34948	0.29885	0.2445	0.525	0.46476	0.24681	0.49082	0.41429
KYNG_ENVIRONMENTAL_STRESS_RESPONSE_UP	86	0.00231	0.13182	0.24377	0.44106	0.00061	0.29572	0.09568	0.38667	0.65553	0.48333	0.28593	0.32994	0.00677	0.04833	0.0113	0.38902	0.02395	0.3805
MARCINIAK_ER_STRESS_RESPONSE_VIA_CHOP	35	0.1977	0.32768	0.05233	0.30432	0.64769	0.4	0.13461	0.005	0.13216	0.14926	0.02208	0.005	0.11963	0.005	0.03982	0.38902	0.03901	0.34845
MIKHAYLOVA_OXIDATIVE_STRESS_RESPONSE_VIA_VHL_DN	9	0.12531	0.38794	0.15527	0.39842	0.6211	0.40837	0.04217	0.33296	0.96343	0.42647	0.34689	0.38839	0.23402	0.40628	1	0.4655	0.03831	0.43092
MIKHAYLOVA_OXIDATIVE_STRESS_RESPONSE_VIA_VHL_UP	8	0.58663	0.36751	0.44666	0.44907	0.86476	0.47664	0.48112	0.38552	0.56123	0.42647	0.77835	0.38839	0.34969	0.43008	0.60292	0.38902	0.83382	0.42076
RESPONSE_TO_OXIDATIVE_STRESS	41	0.06491	0.33886	0.47418	0.26	0.2758	0.38264	0.03892	0.005	0.1319	0.35426	0.07225	0.005	0.49153	0.45173	0.18195	0.16111	0.96727	0.005
RESPONSE_TO_STRESS	561	0.00318	0.13647	0.02892	0.3625	0.00031	0.28504	1e-05	0.33296	0.12961	0.16338	0.00105	0.14684	0.05212	0.47825	0.00022	0.24681	0.00148	0.4162
STRESS_ACTIVATED_PROTEIN_KINASE_SIGNALING_PATHWAY	67	0.33049	0.3774	0.24538	0.23605	0.35855	0.41102	0.07362	0.39341	0.1348	0.42942	0.62053	0.45542	0.19104	0.40628	0.03983	0.41814	0.00365	0.41526
TIMOFEEVA_GROWTH_STRESS_VIA_STAT1_DN	21	0.37947	0.325	0.8634	0.44321	0.5554	0.25991	0.12679	0.3625	0.54028	0.39768	0.9681	0.38762	0.95489	0.31719	1	0.3549	0.9057	0.3879
WEIGEL_OXIDATIVE_STRESS_BY_HNE_AND_H2O2	62	0.40992	0.41862	0.05425	0.22835	0.21121	0.12083	0.04971	0.16571	1	0.42879	0.06805	0.38839	0.68153	0.40628	1	0.38902	0.55694	0.25588
WEIGEL_OXIDATIVE_STRESS_BY_HNE_AND_TBH	108	0.0029	0.46209	0.6268	0.17576	0.11378	0.45951	0.00416	0.37854	0.03656	0.33296	0.87904	0.005	0.68153	0.25	0.91666	0.45789	0.9057	0.34845
WEIGEL_OXIDATIVE_STRESS_BY_TBH_AND_H2O2	55	0.92129	0.36589	0.77396	0.40451	1	0.35202	0.09276	0.32053	0.96894	0.005	0.9681	0.41928	0.70554	0.35636	1	0.005	0.90384	0.005
WEIGEL_OXIDATIVE_STRESS_RESPONSE	56	0.91806	0.48675	0.33078	0.20714	0.46778	0.525	0.00565	0.3893	0.5786	0.39875	0.62714	0.38839	0.35912	0.3302	0.97305	0.38902	0.98313	0.45209
IMMUNOLOGICAL PROCESSES
* ACTIVATION_OF_IMMUNE_RESPONSE	13	0.83386	0.31522	0.78086	0.30945	1	0.203	0.30961	0.40338	0.65553	0.23641	0.95613	0.12609	0.00299	0.005	0.22556	0.30045	0.69982	0.34845
ADAPTIVE_IMMUNE_RESPONSE	20	0.98822	0.22009	0.74995	0.45312	1	0.29572	0.17253	0.37126	0.47846	0.38341	0.59631	0.42841	0.68153	0.44104	0.79674	0.45789	0.88218	0.49671
ADAPTIVE_IMMUNE_RESPONSE_GO_0002460	17	0.98879	0.005	0.88295	0.005	1	0.005	0.08567	0.34693	0.19761	0.30381	0.38017	0.41429	0.5768	0.44746	0.99973	0.38902	0.94432	0.4294
BOHN_PRIMARY_IMMUNODEFICIENCY_SYNDROM_DN	58	0.12342	0.42411	0.14926	0.31949	0.2235	0.46136	0.0332	0.3625	0.02679	0.33697	0.05693	0.32422	0.54776	0.43682	0.80162	0.48333	0.86775	0.41526
BOHN_PRIMARY_IMMUNODEFICIENCY_SYNDROM_UP	82	0.5284	0.005	0.38535	0.20714	0.79956	0.10875	0.0008	0.33296	0.427	0.43923	0.01143	0.3527	0.20076	0.45448	0.70657	0.35753	0.41387	0.43028
GALINDO_IMMUNE_RESPONSE_TO_ENTEROTOXIN	128	8e-05	0.005	0.00056	0.005	1e-05	0.12083	1e-05	0.005	0.15612	0.18125	1e-05	0.33143	0.19569	0.40628	0.00072	0.005	0.64661	0.41429
GOLDRATH_IMMUNE_MEMORY	87	0.85815	0.31829	0.59277	0.40451	0.93294	0.38264	0.18197	0.38552	0.77335	0.06692	0.05352	0.24167	0.89466	0.40628	0.16695	0.39227	0.43314	0.41526
IMMUNE_EFFECTOR_PROCESS	23	0.63035	0.36751	0.59639	0.41429	0.60016	0.35202	0.06123	0.34654	0.04728	0.22809	0.10715	0.13716	0.4539	0.005	0.78685	0.48161	0.9057	0.005
IMMUNE_RESPONSE	152	0.58084	0.42815	0.54635	0.46113	0.5554	0.45951	0.0413	0.44772	0.60978	0.20714	0.53496	0.23932	0.11103	0.25	0.70657	0.45789	0.90384	0.45762
IMMUNE_SYSTEM_DEVELOPMENT	85	0.98387	0.46927	0.74212	0.495	0.93221	0.44893	0.431	0.33296	0.3234	0.4177	0.79713	0.2	0.85153	0.3712	0.52387	0.24681	0.74625	0.41526
IMMUNE_SYSTEM_PROCESS	266	0.98361	0.35525	0.52453	0.39243	0.90104	0.20053	0.00991	0.33296	0.22797	0.33697	0.48817	0.36813	0.50137	0.47825	0.85105	0.4408	0.94379	0.41526
IMMUNOLOGICAL_SYNAPSE	6	0.94949	0.35905	0.36507	0.27067	0.5554	0.4038	0.74472	0.40428	0.92523	0.40744	0.9681	0.3527	0.82742	0.44704	0.74391	0.38902	0.68817	0.41526
INNATE_IMMUNE_RESPONSE	12	0.98822	0.46569	0.54635	0.33886	0.71317	0.29572	0.33473	0.33296	0.36144	0.005	0.15845	0.005	0.95489	0.39357	0.70657	0.38158	0.49082	0.41526
KEGG_AUTOIMMUNE_THYROID_DISEASE	38	0.97197	0.35898	0.85459	0.4176	1	0.35202	0.94974	0.22597	1	0.23641	0.99993	0.24167	0.16584	0.40628	1	0.35753	0.00743	0.45209
KEGG_INTESTINAL_IMMUNE_NETWORK_FOR_IGA_PRODUCTION	35	1	0.13182	0.99999	0.005	1	0.44893	0.95649	0.25588	0.93996	0.005	0.95613	0.005	0.94106	0.40738	1	0.43809	0.82198	0.4294
KEGG_PRIMARY_IMMUNODEFICIENCY	17	0.98387	0.35525	0.98403	0.39842	1	0.39842	0.79767	0.3625	0.72892	0.45215	0.3562	0.37179	0.59934	0.16812	0.99973	0.42987	0.46316	0.005
NEGATIVE_REGULATION_OF_IMMUNE_SYSTEM_PROCESS	13	0.22777	0.47464	0.90143	0.40451	0.797	0.42879	0.99987	0.34613	0.9904	0.36632	0.99993	0.005	0.01652	0.005	0.13646	0.34927	0.00634	0.005
* POSITIVE_REGULATION_OF_IMMUNE_RESPONSE	22	0.96462	0.29	0.80284	0.005	1	0.005	0.28156	0.38552	0.72689	0.22809	0.91671	0.43662	0.01261	0.005	0.0113	0.36893	0.19119	0.16812
POSITIVE_REGULATION_OF_IMMUNE_SYSTEM_PROCESS	49	0.56107	0.29	0.59277	0.22218	0.92045	0.29572	0.01698	0.37545	0.23498	0.22809	0.3188	0.49014	0.08847	0.39161	0.43998	0.51858	0.80915	0.43028
PRODUCTION_OF_MOLECULAR_MEDIATOR_OF_IMMUNE_RESPONSE	8	0.78805	0.41603	0.6268	0.40451	0.81926	0.435	0.09276	0.35868	0.10097	0.005	0.60936	0.42841	0.84306	0.45136	0.97305	0.3649	0.99631	0.3805
REACTOME_IMMUNE_SYSTEM	1019	0.00633	0.51533	0.07638	0.41255	0.01105	0.4339	0.00095	0.44734	0.4426	0.38496	0.02864	0.41429	0.00392	0.3874	0.54851	0.44353	0.01455	0.41429
REACTOME_IMMUNOREGULATORY_INTERACTIONS_BETWEEN_A_LYMPHOID_AND_A_NON_LYMPHOID_CELL	48	0.14226	0.39545	0.44666	0.47326	0.64769	0.435	0.46367	0.38552	0.92523	0.37143	0.99993	0.39779	0.01422	0.40331	1	0.43562	0.00899	0.43028
REACTOME_INNATE_IMMUNE_SYSTEM	261	0.68158	0.35525	0.81528	0.435	0.797	0.32914	0.04518	0.38419	0.59309	0.39206	0.53496	0.005	0.67088	0.38955	0.99973	0.48161	0.87429	0.42533
REACTOME_TRANSLOCATION_OF_ZAP_70_TO_IMMUNOLOGICAL_SYNAPSE	5	0.97197	0.005	0.99519	0.34486	1	0.30327	0.99703	0.33296	1	0.33296	0.99993	0.32222	0.95489	0.45209	1	0.3549	0.9057	0.45378
REGULATION_OF_IMMUNE_EFFECTOR_PROCESS	10	0.98361	0.005	0.6268	0.31949	1	0.10875	0.06464	0.34693	0.00312	0.22809	0.11023	0.13716	0.78131	0.44746	0.73373	0.43851	0.94694	0.45378
* REGULATION_OF_IMMUNE_RESPONSE	22	0.96462	0.29	0.80284	0.005	1	0.005	0.28156	0.38552	0.72575	0.22809	0.91671	0.43662	0.01287	0.005	0.01098	0.36893	0.19393	0.16812
REGULATION_OF_IMMUNE_SYSTEM_PROCESS	54	0.31965	0.32768	0.37456	0.22218	0.797	0.37958	0.03374	0.37545	0.31208	0.34907	0.20976	0.42841	0.11766	0.39161	0.43134	0.43851	0.7444	0.43028
REPAIR SYSTEM
BASE_EXCISION_REPAIR	14	0.47011	0.22009	0.91711	0.435	0.44595	0.29572	0.99703	0.27389	0.70968	0.005	0.99927	0.005	0.90807	0.29309	0.5075	0.27474	0.04946	0.38667
DNA_REPAIR	144	0.15787	0.005	0.0261	0.005	0.10825	0.005	0.22373	0.37286	0.24278	0.33697	0.49066	0.38839	0.47838	0.3302	0.00012	0.005	0.00083	0.005
DOUBLE_STRAND_BREAK_REPAIR	33	0.91516	0.32126	0.22221	0.005	0.50273	0.13034	0.19565	0.35868	0.46489	0.33296	0.22036	0.18547	0.24585	0.005	0.00157	0.005	0.15485	0.005
KEGG_BASE_EXCISION_REPAIR	29	0.07015	0.19902	0.25923	0.23993	0.07094	0.29572	0.91741	0.32067	0.74069	0.33296	0.86093	0.24167	0.09976	0.25	0.04922	0.005	1e-05	0.005
KEGG_MISMATCH_REPAIR	25	0.01376	0.005	0.01492	0.005	0.0248	0.005	0.95649	0.34613	1	0.36632	0.98787	0.32222	0.03333	0.005	0.43699	0.16111	0.02299	0.005
KEGG_NUCLEOTIDE_EXCISION_REPAIR	50	0.0273	0.29195	0.00516	0.005	0.04034	0.22524	0.74393	0.50347	0.36144	0.34907	0.89313	0.45542	0.04795	0.25	0.00439	0.16111	0.00101	0.34845
MATZUK_MEIOTIC_AND_DNA_REPAIR	34	0.15463	0.24167	0.60563	0.39243	1	0.43446	0.68207	0.37286	0.97028	0.22809	0.9681	0.005	0.25723	0.39726	0.3266	0.457	0.88018	0.41526
NUCLEOTIDE_EXCISION_REPAIR	21	0.78515	0.005	0.67052	0.19595	0.90104	0.38264	0.67844	0.35868	0.57748	0.005	0.27315	0.005	0.22069	0.39357	0.02928	0.005	0.05044	0.41526
REACTOME_BASE_EXCISION_REPAIR	14	0.26126	0.005	0.18784	0.28094	0.18342	0.29572	0.91741	0.37126	0.77175	0.28431	0.61404	0.3586	0.36029	0.005	0.40498	0.005	0.03197	0.005
REACTOME_DNA_REPAIR	121	0.11341	0.33646	0.00925	0.005	0.13067	0.29244	0.63032	0.37545	0.78024	0.43004	0.35128	0.32422	0.03444	0.25	0.00032	0.005	0.00183	0.25588
REACTOME_DOUBLE_STRAND_BREAK_REPAIR	35	0.47305	0.3474	0.6268	0.19595	0.72475	0.40278	0.47639	0.37545	0.45754	0.32783	0.53371	0.36632	0.26272	0.29309	0.01503	0.33296	0.46199	0.38531
REACTOME_FORMATION_OF_TRANSCRIPTION_COUPLED_NER_TC_NER_REPAIR_COMPLEX	27	0.14651	0.32222	0.32978	0.16276	0.54269	0.38264	0.0232	0.32067	0.3707	0.37143	0.02073	0.005	0.16579	0.29309	0.27159	0.005	0.02699	0.25588
REACTOME_NUCLEOTIDE_EXCISION_REPAIR	52	0.02467	0.13647	0.00754	0.005	0.0261	0.28504	0.23981	0.35407	0.57748	0.44856	0.2585	0.24167	0.02076	0.25	0.01279	0.005	0.00045	0.25588
REACTOME_REPAIR_SYNTHESIS_FOR_GAP_FILLING_BY_DNA_POL_IN_TC_NER	18	0.00046	0.005	0.00116	0.005	0.00104	0.005	0.94496	0.37545	1	0.39087	0.93862	0.38839	0.01539	0.005	0.12659	0.24681	0.00811	0.005
